# Supplementary material
Source: PubMed Central journal article supplement (PMC4583788)
Supplement: NIHMS693936-supplement-Plots.pdf [file NIHMS693936-supplement-Plots.pdf]

# INFORMAL CAREGIVERS

| Controlled Trials                                                                           |                |           |                                       |           | Pre Post Intervention Studies                                                                |    |                                       |           |  |
|---------------------------------------------------------------------------------------------|----------------|-----------|---------------------------------------|-----------|----------------------------------------------------------------------------------------------|----|---------------------------------------|-----------|--|
| Source                                                                                      | Intervention N | Control N | Standardized Mean Difference (95% CI) | Weight, % | Source                                                                                       | N  | Standardized Mean Difference (95% CI) | Weight, % |  |
| <b>NEGATIVE EMOTIONAL STATES</b>                                                            |                |           |                                       |           | <b>NEGATIVE EMOTIONAL STATES</b>                                                             |    |                                       |           |  |
| <b>Depression</b>                                                                           |                |           |                                       |           | <b>Depression</b>                                                                            |    |                                       |           |  |
| Benn, 2012                                                                                  | 30             | 29        | .372 (-.142, .887)                    | 22.53     | Epstein-Lubow, 2011                                                                          | 9  | 1.680 (.666, 2.695)                   | 10.60     |  |
| Danuclov, 2013                                                                              | 25             | 25        | 1.163 (.563, 1.762)                   | 16.62     | Innes, 2012                                                                                  | 10 | 1.028 (.262, 1.794)                   | 15.31     |  |
| Lavretsky, 2013                                                                             | 23             | 16        | .507 (-.140, 1.155)                   | 14.22     | Lengacher, 2012                                                                              | 23 | .221 (-.192, .635)                    | 26.30     |  |
| Oken, 2010                                                                                  | 10             | 11        | .170 (-.688, 1.028)                   | 8.11      | Minor, 2006                                                                                  | 44 | .532 (.217, .848)                     | 30.00     |  |
| Pomykala, 2012                                                                              | 4              | 5         | .282 (-1.039, 1.604)                  | 3.42      | Waelde, 2004                                                                                 | 12 | .897 (.227, 1.566)                    | 17.78     |  |
| VanPuymbroeck, 2010                                                                         | 12             | 6         | .449 (-.565, 1.463)                   | 5.81      | Total (random effects)                                                                       | 97 | .713 (.322, 1.103)                    |           |  |
| Whitebird, 2013                                                                             | 38             | 40        | .526 (.075, .978)                     | 29.28     |                                                                                              |    |                                       |           |  |
| Total (random effects)                                                                      | 142            | 132       | .553 (.309, .797)                     |           |                                                                                              |    |                                       |           |  |
| Test for Heterogeneity, Q-value=5.447 (p=.488)<br>Test for Overall Effect, Z=4.436 (p<.001) |                |           |                                       |           | Test for Heterogeneity, Q-value=9.663 (p=.046)<br>Test for Overall Effect, Z=3.579 (p<.0001) |    |                                       |           |  |
| <b>Anxiety</b>                                                                              |                |           |                                       |           | <b>Anxiety</b>                                                                               |    |                                       |           |  |
| Benn, 2012                                                                                  | 30             | 29        | .450 (-.067, .967)                    | 27.86     | Epstein-Lubow, 2011                                                                          | 9  | .009 (-.644, .662)                    | 10.55     |  |
| Danuclov, 2013                                                                              | 25             | 25        | 1.291 (.681, 1.900)                   | 26.07     | Innes, 2012                                                                                  | 10 | .317 (-.318, .953)                    | 11.14     |  |
| VanPuymbroeck, 2010                                                                         | 12             | 6         | .941 (-.086, 1.969)                   | 18.33     | Lengacher, 2012                                                                              | 23 | .140 (-.271, .550)                    | 25.55     |  |
| Whitebird, 2013                                                                             | 38             | 40        | 1.768 (1.244, 2.291)                  | 27.74     | Minor, 2006                                                                                  | 43 | .532 (.217, .848)                     | 41.21     |  |
| Total (random effects)                                                                      | 105            | 100       | 1.125 (.475, 1.774)                   |           | Waelde, 2004                                                                                 | 12 | .653 (.030, 1.276)                    | 11.56     |  |
| Test for Heterogeneity, Q-value=12.75 (p=.005)<br>Test for Overall Effect, Z=3.393 (p=.001) |                |           |                                       |           | Test for Heterogeneity, Q-value=4.215 (p=.378)<br>Test for Overall Effect, Z=3.339 (p=.001)  |    |                                       |           |  |
| <b>Stress</b>                                                                               |                |           |                                       |           | <b>Stress</b>                                                                                |    |                                       |           |  |
| Benn, 2012                                                                                  | 30             | 29        | .336 (-.178, .850)                    | 37.91     | Epstein-Lubow, 2011                                                                          | 9  | .737 (.000, 1.474)                    | 12.52     |  |
| Oken, 2010                                                                                  | 10             | 11        | .315 (-.547, 1.177)                   | 13.49     | Innes, 2012                                                                                  | 10 | .814 (.099, 1.529)                    | 13.18     |  |
| Whitebird, 2013                                                                             | 38             | 40        | .604 (.150, 1.058)                    | 48.59     | Lengacher, 2012                                                                              | 23 | .140 (-.271, .550)                    | 31.22     |  |
| Total (random effects)                                                                      | 78             | 80        | .464 (.147, .780)                     |           | Minor, 2006                                                                                  | 43 | .532 (.217, .848)                     | 43.09     |  |
| Test for Heterogeneity, Q-value=.721 (p=.697)<br>Test for Overall Effect, Z=2.871 (p=.004)  |                |           |                                       |           | Test for Heterogeneity, Q-value=4.023 (p=.259)<br>Test for Overall Effect, Z=3.312 (p=.001)  |    |                                       |           |  |
| <b>Caregiver Burden</b>                                                                     |                |           |                                       |           | <b>Caregiver Burden</b>                                                                      |    |                                       |           |  |
| Oken, 2010                                                                                  | 10             | 11        | .141 (-.717, .998)                    | 16.92     | Epstein-Lubow, 2011                                                                          | 9  | 1.199 (.343, 2.056)                   | 28.53     |  |
| Pomykala, 2012                                                                              | 4              | 5         | .205 (-1.114, 1.523)                  | 7.16      | Hoppes, 2012                                                                                 | 10 | 1.028 (.262, 1.794)                   | 31.76     |  |
| VanPuymbroeck, 2010                                                                         | 12             | 6         | .325 (-.661, 1.311)                   | 12.81     | Waelde, 2004                                                                                 | 12 | .217 (-.355, .789)                    | 39.71     |  |
| Whitebird, 2013                                                                             | 38             | 40        | .023 (-.421, .467)                    | 63.11     | Total (random effects)                                                                       | 31 | .755 (.113, 1.397)                    |           |  |
| Total (random effects)                                                                      | 64             | 62        | .094 (-.258, .447)                    |           |                                                                                              |    |                                       |           |  |
| Test for Heterogeneity, Q-value=.348 (p=.951)<br>Test for Overall Effect, Z=.525 (p=.600)   |                |           |                                       |           | Test for Heterogeneity, Q-value=4.709 (p=.095)<br>Test for Overall Effect, Z=2.305 (p=.021)  |    |                                       |           |  |

| POSITIVE EMOTIONAL STATES                                                                   |    |    |                     |       | POSITIVE EMOTIONAL STATES                                                                  |                        |    |                    |       |  |
|---------------------------------------------------------------------------------------------|----|----|---------------------|-------|--------------------------------------------------------------------------------------------|------------------------|----|--------------------|-------|--|
| Self-Efficacy                                                                               |    |    |                     |       |                                                                                            | Self-Efficacy          |    |                    |       |  |
| Benn, 2012                                                                                  | 30 | 29 | .206 (-.600, 1.011) | 39.19 |                                                                                            | Fisher, 2001           | 36 | .390 (.051, .729)  | 60.72 |  |
| Oken, 2010                                                                                  | 10 | 11 | .130 (-.727, .988)  | 34.56 |                                                                                            | Hoppes, 2012           | 10 | .258 (-.372, .888) | 17.57 |  |
| VanPuymbroeck, 2010                                                                         | 12 | 6  | .258 (-.726, 1.241) | 26.25 |                                                                                            | Waelde, 2004           | 12 | .083 (-.484, .649) | 21.71 |  |
| Total (random effects)                                                                      | 52 | 46 | .800 (.026, 1.574)  |       |                                                                                            | Total (random effects) | 58 | .300 (.036, .564)  |       |  |
| Test for Heterogeneity, Q-value=.038 (p=.981)<br>Test for Overall Effect, Z=4.401 (p<.001)  |    |    |                     |       | Test for Heterogeneity, Q-value=.855 (p=.652)<br>Test for Overall Effect, Z=2.229 (p=.026) |                        |    |                    |       |  |
| Mental Health Score (Quality of Life)                                                       |    |    |                     |       |                                                                                            |                        |    |                    |       |  |
| Lavretsky, 2013                                                                             | 23 | 16 | .640 (-.013, 1.294) | 31.74 |                                                                                            |                        |    |                    |       |  |
| Pomykala, 2012                                                                              | 4  | 5  | .354 (-.971, 1.679) | 7.73  |                                                                                            |                        |    |                    |       |  |
| Whitebird, 2013                                                                             | 38 | 40 | 1.046 (.573, 1.519) | 60.53 |                                                                                            |                        |    |                    |       |  |
| Total (random effects)                                                                      | 65 | 61 | .864 (.495, 1.232)  |       |                                                                                            |                        |    |                    |       |  |
| Test for Heterogeneity, Q-value=1.586 (p=.452)<br>Test for Overall Effect, Z=4.597 (p<.001) |    |    |                     |       |                                                                                            |                        |    |                    |       |  |

# HEALTHCARE PROVIDERS

| Controlled Trials                                                                           |                |           |                                       |           | Pre-Post Intervention Studies                                                                |     |                                       |           |
|---------------------------------------------------------------------------------------------|----------------|-----------|---------------------------------------|-----------|----------------------------------------------------------------------------------------------|-----|---------------------------------------|-----------|
| Source                                                                                      | Intervention N | Control N | Standardized Mean Difference (95% CI) | Weight, % | Source                                                                                       | N   | Standardized Mean Difference (95% CI) | Weight, % |
| <b>NEGATIVE EMOTIONAL STATES</b>                                                            |                |           |                                       |           | <b>NEGATIVE EMOTIONAL STATES</b>                                                             |     |                                       |           |
| Burnout – Emotional Exhaustion                                                              |                |           |                                       |           | Burnout – Emotional Exhaustion                                                               |     |                                       |           |
| Cohen-Katz, 2005                                                                            | 14             | 13        | .246 (-.501, 1.004)                   | 17.82     | Brady, 2012                                                                                  | 16  | .352 (-.153, .856)                    | 9.09      |
| Mackenzie, 2006                                                                             | 14             | 16        | .646 (-.090, 1.381)                   | 18.91     | Goodman, 2012 (a)                                                                            | 51  | .490 (.199, .780)                     | 27.48     |
| Oman, 2006                                                                                  | 27             | 31        | .442 (-.081, .964)                    | 37.53     | Goodman, 2012 (b)                                                                            | 42  | .352 (.040, .683)                     | 23.87     |
| Poulin, 2008                                                                                | 28             | 16        | .680 (.050, 1.311)                    | 25.74     | Krasner, 2009                                                                                | 70  | .368 (.126, .610)                     | 39.56     |
| Total (random effects)                                                                      | 83             | 76        | .507 (.187, .827)                     |           | Total (random effects)                                                                       | 179 | .396 (.244, .548)                     |           |
| Test for Heterogeneity, Q-value=.942 (p=.815)<br>Test for Overall Effect, Z=3.106 (p=.002)  |                |           |                                       |           | Test for Heterogeneity, Q-value=.559 (p=.906)<br>Test for Overall Effect, Z=5.096 (p<.001)   |     |                                       |           |
| Burnout - Depersonalization                                                                 |                |           |                                       |           | Burnout - Depersonalization                                                                  |     |                                       |           |
| Cohen-Katz, 2005                                                                            | 14             | 13        | .246 (-.511, 1.004)                   | 17.07     | Brady, 2012                                                                                  | 16  | .173 (-.321, .666)                    | 9.31      |
| Mackenzie, 2006                                                                             | 14             | 16        | .646 (.090, 1.381)                    | 19.22     | Goodman, 2012 (a)                                                                            | 51  | .490 (.199, .780)                     | 26.79     |
| Oman, 2006                                                                                  | 27             | 31        | .442 (-.081, .964)                    | 37.53     | Goodman, 2012 (b)                                                                            | 42  | .329 (.019, .640)                     | 23.45     |
| Poulin, 2008                                                                                | 28             | 16        | .309 (-.308, .927)                    | 26.19     | Krasner, 2009                                                                                | 70  | .174 (-.062, .410)                    | 40.45     |
| Total (random effects)                                                                      | 83             | 76        | .217 (-.099, .534)                    |           | Total (random effects)                                                                       | 179 | .295 (.144, .446)                     |           |
| Test for Heterogeneity, Q-value=1.19 (p=.756)<br>Test for Overall Effect, Z=1.349 (p=.177)  |                |           |                                       |           | Test for Heterogeneity, Q-value=3.015 (p=.389)<br>Test for Overall Effect, Z=3.822 (p<.0001) |     |                                       |           |
| Burnout- Personal Accomplishment                                                            |                |           |                                       |           | Burnout- Personal Accomplishment                                                             |     |                                       |           |
| Cohen-Katz, 2005                                                                            | 14             | 13        | .147 (-.609, .903)                    | 17.93     | Brady, 2012                                                                                  | 16  | .198 (-.296, .693)                    | 9.61      |
| Mackenzie, 2006                                                                             | 14             | 16        | .792 (.048, 1.537)                    | 18.47     | Goodman, 2012 (a)                                                                            | 51  | .521 (.229, .814)                     | 27.49     |
| Oman, 2006                                                                                  | 27             | 31        | .349 (-.171, .869)                    | 37.91     | Goodman, 2012 (b)                                                                            | 42  | .547 (.223, .871)                     | 22.37     |
| Poulin, 2008                                                                                | 28             | 16        | .699 (.067, 1.330)                    | 25.70     | Krasner, 2009                                                                                | 70  | .339 (.098, .580)                     | 40.53     |
| Total (random effects)                                                                      | 83             | 76        | .485 (.164, .805)                     |           | Total (random effects)                                                                       | 179 | .422 (.269, .575)                     |           |
| Test for Heterogeneity, Q-value=2.125 (p=.547)<br>Test for Overall Effect, Z=2.967 (p=.003) |                |           |                                       |           | Test for Heterogeneity, Q-value=2.255 (p=.521)<br>Test for Overall Effect, Z=5.394 (p<.0001) |     |                                       |           |
| <b>POSITIVE EMOTIONAL STATES</b>                                                            |                |           |                                       |           | <b>Stress</b>                                                                                |     |                                       |           |
| Self-Efficacy                                                                               |                |           |                                       |           | Stress                                                                                       |     |                                       |           |
| Oman, 2008                                                                                  | 27             | 31        | 1.086 (.548, 1.623)                   | 36.51     | Brady, 2012                                                                                  | 16  | .737 (.184, 1.289)                    | 13.00     |
| Pipe, 2009                                                                                  | 15             | 17        | 0.000 (-.694, .694)                   | 31.47     | Cutshall, 2011                                                                               | 11  | .375 (.091, .659)                     | 49.24     |
| Shapiro, 2005                                                                               | 18             | 20        | 1.020 (.343, 1.696)                   | 32.02     | Schenstrom, 2006                                                                             | 52  | .547 (.223, .871)                     | 37.76     |
| Total (random effects)                                                                      | 60             | 68        | .723 (.060, 1.386)                    |           | Total (random effects)                                                                       | 79  | .487 (.288, .686)                     |           |
| Test for Heterogeneity, Q-value=6.572 (p=.037)<br>Test for Overall Effect, Z=2.025 (p=.043) |                |           |                                       |           | Test for Heterogeneity, Q-value=1.514 (p=.469)<br>Test for Overall Effect, Z=4.790 (p<.0001) |     |                                       |           |
| Life Satisfaction                                                                           |                |           |                                       |           | (a) physicians (b) other healthcare professionals                                            |     |                                       |           |
| Mackenzie, 2006                                                                             | 19             | 14        | .649 (-.059, 1.356)                   | 18.89     |                                                                                              |     |                                       |           |
| Oman, 2006                                                                                  | 27             | 31        | .334 (-.186, .853)                    | 25.07     |                                                                                              |     |                                       |           |
| Poulin, 2008                                                                                | 28             | 16        | .678 (.047, 1.308)                    | 23.82     |                                                                                              |     |                                       |           |
| Shapiro, 2005                                                                               | 18             | 20        | .637 (-.016, 1.289)                   | 22.22     |                                                                                              |     |                                       |           |
| Total (random effects)                                                                      | 92             | 81        | .543 (.235, .850)                     |           |                                                                                              |     |                                       |           |
| Test for Heterogeneity, Q-value=0.963 (p=.810)<br>Test for Overall Effect, Z=3.456 (p=.001) |                |           |                                       |           |                                                                                              |     |                                       |           |
