# Supplementary material
Source: PubMed Central journal article supplement (PMC4583788)
Supplement: NIHMS693936-supplement-Tables.pdf [file NIHMS693936-supplement-Tables.pdf]

Online Appendix.

eTable 1. Main Results Table, Informal Caregivers

| Reference                                                                                                                                                                                                                                                                                                                                                                                                                                                                                                                                                                                                                                                     | Study Design | Caregiver's service population                                                      | Caregiver population                            | # Enrolled | Intervention                                                                                                                                                                                                                                                                                                                                                                                  | Control Group | Outcomes Measures (including instruments and timing)                                                                                                                                                                                                                                                                                                                                                                                                                                                                                                                                                                                                                                                                                                                  | Study Quality Score (Downs and Black Criteria <sup>13</sup> ) |
|---------------------------------------------------------------------------------------------------------------------------------------------------------------------------------------------------------------------------------------------------------------------------------------------------------------------------------------------------------------------------------------------------------------------------------------------------------------------------------------------------------------------------------------------------------------------------------------------------------------------------------------------------------------|--------------|-------------------------------------------------------------------------------------|-------------------------------------------------|------------|-----------------------------------------------------------------------------------------------------------------------------------------------------------------------------------------------------------------------------------------------------------------------------------------------------------------------------------------------------------------------------------------------|---------------|-----------------------------------------------------------------------------------------------------------------------------------------------------------------------------------------------------------------------------------------------------------------------------------------------------------------------------------------------------------------------------------------------------------------------------------------------------------------------------------------------------------------------------------------------------------------------------------------------------------------------------------------------------------------------------------------------------------------------------------------------------------------------|---------------------------------------------------------------|
| Benn <sup>35</sup><br>2012<br>USA                                                                                                                                                                                                                                                                                                                                                                                                                                                                                                                                                                                                                             | RCT          | Special needs children using the special education services of the school district. | Parents and educators of special needs children | 60         | 5 wks (2.5 hrs, 2x per week and 2 full day sessions, 36 hrs of teaching plus homework). Educators and parents met in separate groups.<br><br><u>Content:</u> SMART-in Education (stress management, relaxation techniques) - 70% Kabat-Zinn MBSR, adds emotional theory, compassion, mindfulness applied to teaching and parenting. Homework: sitting practices, monitor emotional responses. | wait-list     | <u>Instruments</u> <ul style="list-style-type: none"> <li>• 5 Facet Mindfulness Questionnaire Perceived Stress Scale State-Trait Anxiety Inventory</li> <li>• Center for Epidemiologic Studies Depression (CES-D) Scale</li> <li>• Positive and Negative Affect Schedule Psychological Well-Being Scale</li> <li>• Neff self-compassion scale</li> <li>• Brown &amp; Phillips Forgiveness Questionnaire Interpersonal Reactivity Index</li> <li>• Emotion Regulation at Work Self-Efficacy Scale</li> <li>• Everyday Parenting Scale</li> <li>• Parenting Stress Index</li> </ul> <u>Measurement timing:</u><br>1 week pre-tx, 1 wk post-tx and 2 months post-tx<br>Attrition: 43 left by end of study. Most pts had 10min formal mindfulness practice daily at home. | 17                                                            |
| <p><b>Results</b><br/>All measures favored meditation therapy group post tx and 2 months post tx.<br/><u>Mindfulness:</u> medium size effect post tx.<br/><u>Stress, Anxiety, Depression, Self-Compassion, Positive/Negative WellBeing :</u> all had medium size effects post tx. 2 months post tx, the sig effect of MT on depression gone but larger effect sizes on mindfulness, stress, anxiety and positive well being indicators. <u>Self-efficacy:</u> small size effect downward, not statistically significant<br/><u>Empathic concern</u> medium effect at f/u and post tx sig for MT; <u>Forgiveness</u> stat sig diff at f/u, not at post tx.</p> |              |                                                                                     |                                                 |            |                                                                                                                                                                                                                                                                                                                                                                                               |               |                                                                                                                                                                                                                                                                                                                                                                                                                                                                                                                                                                                                                                                                                                                                                                       |                                                               |

|                                                                                                                                                                                                                                                                                                                                                                                                                                                                                                                                                                                                                                                                             |     |                   |                                                    |    |                                                                                                                                                                                                                                                                                                                        |                                                                                                                                                            |                                                                                                                                                                                                                                                                                                                                                                                                                                                                                                                                                                                                                                       |    |
|-----------------------------------------------------------------------------------------------------------------------------------------------------------------------------------------------------------------------------------------------------------------------------------------------------------------------------------------------------------------------------------------------------------------------------------------------------------------------------------------------------------------------------------------------------------------------------------------------------------------------------------------------------------------------------|-----|-------------------|----------------------------------------------------|----|------------------------------------------------------------------------------------------------------------------------------------------------------------------------------------------------------------------------------------------------------------------------------------------------------------------------|------------------------------------------------------------------------------------------------------------------------------------------------------------|---------------------------------------------------------------------------------------------------------------------------------------------------------------------------------------------------------------------------------------------------------------------------------------------------------------------------------------------------------------------------------------------------------------------------------------------------------------------------------------------------------------------------------------------------------------------------------------------------------------------------------------|----|
| Black <sup>39</sup><br>2013<br>USA                                                                                                                                                                                                                                                                                                                                                                                                                                                                                                                                                                                                                                          | RCT | Dementia patients | primary caregivers for elderly person > 3 days/wk. | 45 | 8 wks (12 minutes daily) using audio CD guidance<br><br><u>Content:</u><br>Kirtan Kriya Meditation, kundalini yoga practice: 12 min yogic meditation and chanting practice using audio CD. 1 min silent focus inward, 11 min repetitive finger movements and chanting, then deep breathing and visualization of light. | 8 wks (12 minutes daily) using CD.<br><br><u>Content</u><br>Relaxing Music: relax in quiet place w/eyes closed listening to instrumental music CD provided | <u>Instruments</u> <ul style="list-style-type: none"> <li>• Short Form 36 Health Survey (SF 36)</li> <li>• Hamilton Rating Scale for Depression (HAM-D)</li> <li>• Cumulative Illness Rating scale</li> <li>• MMSE at baseline</li> </ul> Peripheral blood mononuclear cells isolated for genome-wide transcription profiling. Differentially expressed genes analyzed for prevalence of transcription factor binding motifs targeted by NF-kB and Interferon Response Factor 1<br>Other measures as per Lavretsky 2012 study<br><br><u>Measurement timing:</u><br>Blood samples drawn between 10-11am at baseline and 8 weeks later. | 14 |
| <p><b>Results</b></p> <p><u>HAM-D:</u> 65.2% of KKM pts showed 50% improvement vs 31.2% RM pts had 50% improvement. <math>p &lt; 0.05^*</math></p> <p><u>SF 36 Mental Health Summary Score:</u> 52% of KKM pts showed 50% improvement vs 19% RM pts improved 50% <math>p &lt; 0.05^*</math></p> <p><u>NF-kB:</u> KKM pts had reduced expression of genes w/ NF-kB response elements <math>p = 0.006</math></p> <p><u>IRF1:</u> KKM pts had increased expression of genes w/ IRF1 response elements <math>p = 0.040</math>.</p> <p>49 genes relatively down-regulated and 19 rel up-regulated in KKM vs RM.</p> <p>*incompleted reported – not included in meta-analysis</p> |     |                   |                                                    |    |                                                                                                                                                                                                                                                                                                                        |                                                                                                                                                            |                                                                                                                                                                                                                                                                                                                                                                                                                                                                                                                                                                                                                                       |    |

|                                                                                                                                                                                                                                                                                                                                                                                                                                                                                                                                              |          |                                                                                         |                                                     |    |                                                                                                                                                                                                                                                          |           |                                                                                                                                                                                                                                                                                                                                                                                                                                                                                                                                                            |    |
|----------------------------------------------------------------------------------------------------------------------------------------------------------------------------------------------------------------------------------------------------------------------------------------------------------------------------------------------------------------------------------------------------------------------------------------------------------------------------------------------------------------------------------------------|----------|-----------------------------------------------------------------------------------------|-----------------------------------------------------|----|----------------------------------------------------------------------------------------------------------------------------------------------------------------------------------------------------------------------------------------------------------|-----------|------------------------------------------------------------------------------------------------------------------------------------------------------------------------------------------------------------------------------------------------------------------------------------------------------------------------------------------------------------------------------------------------------------------------------------------------------------------------------------------------------------------------------------------------------------|----|
| Danucalov <sup>36</sup><br>2013<br>Brazil                                                                                                                                                                                                                                                                                                                                                                                                                                                                                                    | RCT      | Alzheimer's patients                                                                    | Family caregivers                                   | 46 | 2 months (1 hr 15min session 3x/wk)<br>1 'live' session/wk, 2 sessions /wk at home w/DVD.<br><br><u>Content:</u><br>Hatha yoga, awareness, voluntary regulation of breath, mindfulness meditation and compassion meditation.                             | wait-list | <u>Instruments</u> <ul style="list-style-type: none"> <li>• Beck Depression Inventory (BDI)</li> <li>• Beck Anxiety Inventory (BAI)</li> <li>• Lipp's Stress Symptoms Inventory for Adults (LSSIA)</li> </ul> Salivary cortisol<br><br><u>Measurement timing:</u><br>Surveys at baseline and 2 months post tx<br>Cortisol: 8 samples collected per pt: 4 at baseline: 2 samples/day on 2 consecutive days (immediately upon waking (in dark) and 30 min after waking up, fasting (after exposure to natural light). 4 samples after intervention completed | 11 |
| <u>Results</u><br>BDI: score 16.0+/-7.8 pre-tx, 8.2+/-4.6 post-tx. Stat sig change within grp and vs control: both p<0.001.<br>BAI: pre-tx 17.6+/-9.4, post-tx 8.7+/-5.5, stat sig change within grp and vs control p<0.001.<br>LSSIA: 68% (17pts) scored 'absence of stress' post-tx p<0.05.*<br>Cortisol: Day 2 scores: 937.6+/-171.3 pre-tx and 408.1+/-81.3 post-tx, p<0.05. Reduction in average score (day 1 + day 2) pre-tx: 823.0+/-131.2 vs post-tx: 424.6+/-55.3, p<0.001<br>*incompletely reported, not included in meta-analysis |          |                                                                                         |                                                     |    |                                                                                                                                                                                                                                                          |           |                                                                                                                                                                                                                                                                                                                                                                                                                                                                                                                                                            |    |
| Epstein-Lubow <sup>20</sup><br>2011<br>USA                                                                                                                                                                                                                                                                                                                                                                                                                                                                                                   | pre-post | Nursing home or homecare patients with dementia or other significant medical conditions | Family caregivers spending >20hrs/wk caring for pt. | 9  | 8 wks (75 min session/wk, daily homework x 30 min).<br><br><u>Content:</u><br>MBSR (yoga and seated meditation), rationale for mindfulness, guided techniques, loving-kindness and forgiveness meditation, examples of stress from caregiving scenarios. | N/A       | <u>Instruments</u> <ul style="list-style-type: none"> <li>• Center for Epidemiologic Studies Depression Scale (CES-D)</li> <li>• Zarit Burden Interview (ZBI)</li> <li>• State-Trait Anxiety Inventory (STAI)</li> <li>• Inventory of Complicated Grief (ICG)</li> <li>• Perceived Stress Scale (PSS)</li> <li>• SF12 Health Survey (SF 12)</li> <li>• Kentucky Inventory of Mindfulness Skills (KIMS)</li> </ul> <u>Measurement timing:</u><br>Baseline, 8 wks, and 4 wks f/u. KIMS and CESD also done at 4 wk mark.<br>Qualitative comments written      | 10 |

|                                                                                                                                                                                                                                                                                                                                                                                                                                                                                                                                                                                                            |          |                                                                |                                                            |                                     |                                                                                                                                                                                                                                                            |     |                                                                                                                                                                                                                                                                                                                                                                        |    |
|------------------------------------------------------------------------------------------------------------------------------------------------------------------------------------------------------------------------------------------------------------------------------------------------------------------------------------------------------------------------------------------------------------------------------------------------------------------------------------------------------------------------------------------------------------------------------------------------------------|----------|----------------------------------------------------------------|------------------------------------------------------------|-------------------------------------|------------------------------------------------------------------------------------------------------------------------------------------------------------------------------------------------------------------------------------------------------------|-----|------------------------------------------------------------------------------------------------------------------------------------------------------------------------------------------------------------------------------------------------------------------------------------------------------------------------------------------------------------------------|----|
|                                                                                                                                                                                                                                                                                                                                                                                                                                                                                                                                                                                                            |          |                                                                |                                                            |                                     |                                                                                                                                                                                                                                                            |     | each class.                                                                                                                                                                                                                                                                                                                                                            |    |
| <b>Results</b><br>CES-D: Baseline 16.6 (12.9), effect size 0.29 during active tx but returned to pre-tx levels at 12wks.<br>ZBI: effect size 0.63 at 12 wks, p=0.007 reduction in burden at 12 wks<br>STAI: no stat sig repeated measures; PSS, SF-12, ICG: not stat sig. KIMS: overall score not state sig<br>Qualitative: compassion & forgiveness exercise most helpful.                                                                                                                                                                                                                                |          |                                                                |                                                            |                                     |                                                                                                                                                                                                                                                            |     |                                                                                                                                                                                                                                                                                                                                                                        |    |
| Fisher <sup>45</sup><br>2001<br>Canada                                                                                                                                                                                                                                                                                                                                                                                                                                                                                                                                                                     | pre-post | Alzheimer's' or Alzheimer's'-related dementia pts in community | Family caregivers providing>2hrs care/day to family member | 36                                  | 6 wks of sessions, manual and classical music tape for home practice.<br><br><u>Content:</u> Stress management and relaxation training. Deep breathing, Benson & McKee full relaxation response, guided imagery, Jacobson's progressive muscle relaxation. | N/A | <b>Instruments</b> <ul style="list-style-type: none"> <li>Memory and Behavior Problem Checklist (modified to create self-efficacy scale)</li> </ul> <u>Measurement timing:</u><br>Baseline and at 6 wks                                                                                                                                                                | 9  |
| <b>Results</b><br>Behavior Problem Part A: No stat sig decrease in incidence.<br>Self-Efficacy Part B: Mean self-efficacy pre-tx 3.38 (SD 0.66), post-tx 3.60, (SD 0.63), p=0.025                                                                                                                                                                                                                                                                                                                                                                                                                          |          |                                                                |                                                            |                                     |                                                                                                                                                                                                                                                            |     |                                                                                                                                                                                                                                                                                                                                                                        |    |
| Hoppes <sup>29</sup><br>2012<br>USA                                                                                                                                                                                                                                                                                                                                                                                                                                                                                                                                                                        | pre-post | Dementia patients                                              | Family caregivers                                          | 11                                  | 4 wks (1 hr session/wk)<br><br><u>Content:</u><br>Intentional breathing, visualizing an inner safe harbor, walking meditation, walking without a goal meditation.                                                                                          | N/A | <b>Instruments</b> <ul style="list-style-type: none"> <li>Bedard Burden Interview</li> <li>Snyder State Hope Scale</li> <li>Life-Orientation Test</li> <li>Freiburg Mindfulness Inventory</li> </ul> Qualitative Interviews<br><br><u>Measurement timing:</u><br>Baseline, end of session 4 and at 1 month follow-up.<br>Qualitative interviews: at 1 month follow-up. | 7  |
| <b>Results</b><br>Burden: Pre-tx mean: 34.2, SD:6.23, Post-tx mean 27.8, SD 6.61, 1 month: 30.70 SD 7.53, p<0.01.<br>Self-Efficacy/Hope: Pre-tx 14.6 SD 3.5, Post-tx 17.10, SD 3.7, 1 month 17.8 SD 4.34. p<0.01. Correlation among variables at 1 month follow up: hope, mindfulness, and optimism all strongly negatively correlated to burden.<br>Mindfulness: Not stat sig change. <u>Optimism:</u> not stat sig change.<br><u>Qualitative:</u> themes: increased acceptance increased sense of presence, increased sense of peace/calm, decreased reactivity to difficult behaviors of family members |          |                                                                |                                                            |                                     |                                                                                                                                                                                                                                                            |     |                                                                                                                                                                                                                                                                                                                                                                        |    |
| Innes <sup>40</sup><br>2012 USA                                                                                                                                                                                                                                                                                                                                                                                                                                                                                                                                                                            | pre-post | Community-dwelling adults w/mild cognitive impairment or       | Live-in caregiving relative                                | 12 (6 dyads of caregivers and their | 8wks (30-45min in-person yogic meditation training, then 11min 2x/day practice at home with CD of guided meditation, cues and ocean                                                                                                                        | N/A | <b>Instruments</b> <ul style="list-style-type: none"> <li>Perceived Stress Scale (PSS)</li> <li>Profile of Mood States (PoMS)</li> </ul>                                                                                                                                                                                                                               | 11 |

|                                                                                                                                                                                                                                                                                                                                                                                                                                                                                                                                                                                                                                                                                                                                                                                                                             |          |                             |                                                                                          |                                |                                                                                                                                                                                          |                                                                                                                                                |                                                                                                                                                                                                                                                                                                                                                                                                                                                 |    |
|-----------------------------------------------------------------------------------------------------------------------------------------------------------------------------------------------------------------------------------------------------------------------------------------------------------------------------------------------------------------------------------------------------------------------------------------------------------------------------------------------------------------------------------------------------------------------------------------------------------------------------------------------------------------------------------------------------------------------------------------------------------------------------------------------------------------------------|----------|-----------------------------|------------------------------------------------------------------------------------------|--------------------------------|------------------------------------------------------------------------------------------------------------------------------------------------------------------------------------------|------------------------------------------------------------------------------------------------------------------------------------------------|-------------------------------------------------------------------------------------------------------------------------------------------------------------------------------------------------------------------------------------------------------------------------------------------------------------------------------------------------------------------------------------------------------------------------------------------------|----|
|                                                                                                                                                                                                                                                                                                                                                                                                                                                                                                                                                                                                                                                                                                                                                                                                                             |          | Alzheimers' dementia        |                                                                                          | family member receiving care). | sounds,<br><br><u>Content:</u><br>Kirtan-Kriya yogic meditation (finger movements, mantra)                                                                                               |                                                                                                                                                | <ul style="list-style-type: none"> <li>Positive &amp; Negative Affect Scale (PANAS)</li> <li>Dispositional Resilience Scale (DRS)</li> <li>General Sleep Disturbance Scale (GSD)</li> <li>Self-Compassion Scale (SCS)</li> <li>Memory Functioning Questionnaire Treatment (MFS)</li> </ul><br>Heart Rate<br>Blood Pressure (BP)<br><br><u>Measurement timing:</u><br>Baseline and at 8 wks                                                      |    |
| <b>Results</b><br>Tx effects did not vary by grp - pooled for analysis<br>PSS: 17.3+/-2.1 to 11.8+/-1.4 (p=0.03); POMS depression subscale: 9.4+/-2.2 to 5.7+/-1.2 (p=0.01)<br>GSD: 32.9+/-5.8 to 26.9+/-3.8 (p=0.02); MFS retrospective memory subscale: 10.8+/-1.8 to 17.1+/-2.5 (p=0.04)<br>PANAS, DRS*, SCS*: no stat sig change; Systolic BP: 128.2+/-4.0 to 121.8+/-4 (p= 0.004)<br>*incompletely reported, not included in meta-analysis                                                                                                                                                                                                                                                                                                                                                                             |          |                             |                                                                                          |                                |                                                                                                                                                                                          |                                                                                                                                                |                                                                                                                                                                                                                                                                                                                                                                                                                                                 |    |
| Lavretsky <sup>37</sup><br>2012<br>USA                                                                                                                                                                                                                                                                                                                                                                                                                                                                                                                                                                                                                                                                                                                                                                                      | RCT      | Dementia patients           | Family caregivers identified as primary source of assistance, in contact w/pt >3 days/wk | 49                             | 8 wks (practicing 12min/day at home using meditation CD).<br><br><u>Content:</u><br>Kirtan Kriya yoga practice (finger movements, mantra, silence, deep breathing, light visualization). | 8 wks (12 min/day at home using instrumental music on CD).<br><br><u>Content:</u><br>relaxation -listen to music in quiet place w/eyes closed. | <u>Instruments</u> <ul style="list-style-type: none"> <li>SF 36 Health Survey (SF 36)</li> <li>Hamilton Rating Scale for Depression (HAM-D)</li> <li>Energy</li> <li>Cumulative Illness Rating scale</li> <li>Mini Mental State Exam</li> <li>California Verbal Learning Test II - Trail Making A &amp; B</li> </ul><br>Telomere extraction from peripheral blood mononuclear cells<br><br><u>Measurement timing:</u><br>Baseline and at 8 wks. | 13 |
| <b>Results</b><br>SF MCS 36: Meditation grp: 52.2% grp had response vs Relax grp: 18.7% responded p=0.02.<br>HAM-D: Meditation grp: 65.2% responded vs Relax: 31.2% responded p=0.03.<br>Energy: Meditation group increase score increase 19.6 (SD 20.6) vs Relax 5.0 (SD 16.7), p=0.01<br>Cognition: MMSE total change Meditation grp: 0.2(SD 0.7) vs Relax :-0.9(SD 1.2) p=0.0003<br>Trails B: Meditation grp -11.2(19.7) vs Relax: 9.9(30.5) p=0.005.<br>Telomerase activity: 43.3% increase in Meditation grp vs 3.7% increase in Relax grp. p=0.05. Increased telomere activity correlated with: decreased depression r=-0.33p=0.05 and mental health score (SF-36) (r=0.44,p=0.01) in the entire sample. Increased telomere activity sig assoc w/improved mental health score in meditation sample only r=0.59 p=0.01 |          |                             |                                                                                          |                                |                                                                                                                                                                                          |                                                                                                                                                |                                                                                                                                                                                                                                                                                                                                                                                                                                                 |    |
| Lengacher <sup>30</sup><br>2012<br>USA                                                                                                                                                                                                                                                                                                                                                                                                                                                                                                                                                                                                                                                                                                                                                                                      | pre-post | Community-dwelling advanced | Family caregiver at home or                                                              | 26 dyads of pt and caregiver   | 6 wks (Wk 1,3,6: in person class – 2 hr session for Wk 6. Wk 2,4,5: at home using                                                                                                        | N/A                                                                                                                                            | <u>Instruments</u> <ul style="list-style-type: none"> <li>Perceived Stress Scale</li> </ul>                                                                                                                                                                                                                                                                                                                                                     | 10 |

|                                                                                                                                                                                                                                                                                                                                                                                                                                                                                                                                                                                                                                                                                                                                                                                                                                                                                 |          |                                                                                                                    |                                                                 |    |                                                                                                                                                                                                                                                                                  |     |                                                                                                                                                                                                                                                                                                                                                                                                                                                                            |   |
|---------------------------------------------------------------------------------------------------------------------------------------------------------------------------------------------------------------------------------------------------------------------------------------------------------------------------------------------------------------------------------------------------------------------------------------------------------------------------------------------------------------------------------------------------------------------------------------------------------------------------------------------------------------------------------------------------------------------------------------------------------------------------------------------------------------------------------------------------------------------------------|----------|--------------------------------------------------------------------------------------------------------------------|-----------------------------------------------------------------|----|----------------------------------------------------------------------------------------------------------------------------------------------------------------------------------------------------------------------------------------------------------------------------------|-----|----------------------------------------------------------------------------------------------------------------------------------------------------------------------------------------------------------------------------------------------------------------------------------------------------------------------------------------------------------------------------------------------------------------------------------------------------------------------------|---|
|                                                                                                                                                                                                                                                                                                                                                                                                                                                                                                                                                                                                                                                                                                                                                                                                                                                                                 |          | cancer patients (Stage III-IV breast, lung, colon or prostate ca post-surgery & on radiation therapy/chemotherapy) | assisting w/ appointments                                       |    | CDs). Practice 15-45min/day informally and 15-45min/day formally, 6 days/wk.<br><br><u>Content:</u><br>Sitting/walking meditation, body scan, yoga. Given practice, examples, manual of poses, exercises and homework. Asked to log work.                                        |     | (PSS)<br><ul style="list-style-type: none"> <li>Center for Epidemiology Studies Depression (CES-D)</li> <li>State-Trait Anxiety Inventory (STAI)</li> <li>Memorial Symptom Assessment Scale Medical (MSAS)</li> <li>Outcomes Studies Short Form General Health Survey</li> </ul> Salivary Cortisol and IL-6 collected btw 10am-noon<br><br><u>Measurement timing:</u> at baseline and post 6 wk intervention. Cortisol and IL-6 saliva sample collected btw 10am and noon. |   |
| <b>Results</b><br>5 pts, 2 caregivers on steroids- 3 included in immune analysis. Only 10 dyads did immune analysis as was added after 17 dyads already enrolled.<br>Stat sig <i>caregivers</i> results:<br>MSAS psych scale: 4.1(2.6) pre-tx to 3.5(2.4) (p=0.04)<br>Other caregiver scales not stat sig.<br>Stat sig results for pts:<br>PSS: 19.5+/-7.1 pre-tx to 16.8+/-6 (p=0.04) STAI 42.7+/-12.6 to 39.3+/-10.2 (p=0.05)<br>MSAS: total score 3.6(1.8) to 2.9(1.5) (p=0.006), global score 3.1(1.8) to 2.4(1.6) (p0.01), physical 4(2) to 2.1(1.9) (p0.02), psych score 4.6(2.9) to 3.7(2.4)(p0.02)<br>Cortisol pts wk 1 change p=0.042, carer wk 1 p=0.05, caregivers wk 3 p=0.029 Overall cortisol levels about 50% reduction btw wk 1 and wk 6<br>IL-6: carers post-tx change at wk 1 p=0.029, pts wk 3 p=0.033, pts wk 6 p=0.02, lower levels at wk6 vs wk 1 overall |          |                                                                                                                    |                                                                 |    |                                                                                                                                                                                                                                                                                  |     |                                                                                                                                                                                                                                                                                                                                                                                                                                                                            |   |
| Minor <sup>22</sup><br>2006<br>Canada                                                                                                                                                                                                                                                                                                                                                                                                                                                                                                                                                                                                                                                                                                                                                                                                                                           | pre-post | Children w/chronic illness.                                                                                        | Family caregivers of children attending hospital-based clinics. | 44 | 8 wks(2hr session/wk).<br>Fnl session: 1hr 45min meditation and debriefing.<br><br><u>Content</u><br>Sitting/walking meditation, yoga, body scan, guided imagery. Given program manual, mindful parenting manual, 2 CDs of above material. Homework: 45 min practice, 6 days/wk. | N/A | <u>Instruments</u><br><ul style="list-style-type: none"> <li>Symptoms of Stress Inventory (SoSI), <ul style="list-style-type: none"> <li>Depression subscale</li> <li>Anxiety subscale</li> </ul> </li> <li>Profile of Mood States (PoMS)</li> </ul> <u>Measurement timing:</u><br>Baseline and after 8 <sup>th</sup> session                                                                                                                                              | 8 |
| <b>Results</b><br>SOSI total stress score decreased 32% p<0.001, stat sig diffs in all subscales p<0.001.<br>Depression subscale decreased, p<.001, Anxiety subscale decreased, p<.001<br>POMS total mood disturbance score 56% reduction p<0.001 and stat sig diffs in all subscales.                                                                                                                                                                                                                                                                                                                                                                                                                                                                                                                                                                                          |          |                                                                                                                    |                                                                 |    |                                                                                                                                                                                                                                                                                  |     |                                                                                                                                                                                                                                                                                                                                                                                                                                                                            |   |

|                                                                                                                                                                                                                                                                                                                                                                                                                                                                                                                                                                                                  |     |                   |                                                                      |    |                                                                                                                                                                                                                                                                                                                                                                                                                                                                                                                                                                                                                                                                     |                                                 |                                                                                                                                                                                                                                                                                                                                                                                                                                                                                                                                                                                                                                                                                                                                                                                                                       |    |
|--------------------------------------------------------------------------------------------------------------------------------------------------------------------------------------------------------------------------------------------------------------------------------------------------------------------------------------------------------------------------------------------------------------------------------------------------------------------------------------------------------------------------------------------------------------------------------------------------|-----|-------------------|----------------------------------------------------------------------|----|---------------------------------------------------------------------------------------------------------------------------------------------------------------------------------------------------------------------------------------------------------------------------------------------------------------------------------------------------------------------------------------------------------------------------------------------------------------------------------------------------------------------------------------------------------------------------------------------------------------------------------------------------------------------|-------------------------------------------------|-----------------------------------------------------------------------------------------------------------------------------------------------------------------------------------------------------------------------------------------------------------------------------------------------------------------------------------------------------------------------------------------------------------------------------------------------------------------------------------------------------------------------------------------------------------------------------------------------------------------------------------------------------------------------------------------------------------------------------------------------------------------------------------------------------------------------|----|
| Oken <sup>32</sup><br>2010<br>USA                                                                                                                                                                                                                                                                                                                                                                                                                                                                                                                                                                | RCT | Dementia patients | Family caregivers providing >12hrs/wk of care to relative w/dementia | 31 | <p>Meditation grp (MBCT): 7 wks (90 min session/wk x 6 wks plus wk 1 overview of dementia and information on developing action plans)</p> <p><u>Content:</u><br/>Instruction re: stress, relaxation, meditation, problem solving in applying principles. Included seated meditation, body awareness, breathing space.</p> <p>Education grp (PCT): 7 wks (6 wkly classes and wk 1 overview of dementia and action plan development).</p> <p><u>Content:</u><br/>Based on Powerful Tools for Caregivers curriculum: self care, communicating needs for carer and pt, caregiver decisions.<br/>Homework: reading from Caregiver Handbook, completing action plans.</p> | Respite: provided respite care 3hrs/wk x 7 wks. | <p><u>Instruments</u></p> <ul style="list-style-type: none"> <li>• Revised Memory and Behavior problems Checklist (RMBC)</li> <li>• Caregiver Appraisal Tool Centre for Epidemiology Studies Depression (CES-D) Scale</li> <li>• General Perceived Self-Efficacy Scale (PSS)</li> <li>• Pittsburgh Sleep Quality Index Epworth Sleep Questionnaire</li> <li>• Global Impression of Change Scale</li> <li>• Neuropsychiatric Inventory of reported pt behavior</li> <li>• Coping Responses Inventory</li> <li>• Mindful Attention Awareness</li> </ul> <p>Salivary cortisol<br/>Interleukin 6 (IL6)<br/>Tumor Necrosis Factor (TNF)<br/>C reactive protein</p> <p><u>Measurement timing:</u><br/>within 3 weeks of start and end of classes.<br/>Cortisol: upon waking, 30min after eating, and bedtime (10-11pm).</p> | 14 |
| <p><b>Results</b><br/>RMBC reaction score stat sig diff btw 3 grps p=0.03. Post-tx RMBC scores higher in respite grp than MBCT grp p=0.041 or PCT grp p=0.839. Confidence scores stat sig diff btw grps p=0.026, lower for respite than MBCT p=0.010, diff btw MBCT and PCT post-tx p=0.036.<br/>PSS: decline in intervention group, increase in education and respite control groups, p.332<br/>CES-D: decrease in intervention group, decrease in education control, and increase in respite control group, p=.705<br/>Cortisol, IL-6, TNF, CRP, other scales: no significant differences.</p> |     |                   |                                                                      |    |                                                                                                                                                                                                                                                                                                                                                                                                                                                                                                                                                                                                                                                                     |                                                 |                                                                                                                                                                                                                                                                                                                                                                                                                                                                                                                                                                                                                                                                                                                                                                                                                       |    |

|                                                                                                                                                                                                                                                                                                                                                                                                                                                                                                                                                                                                                                                                                                                                                                                                                                                                                  |                  |                                                         |                                              |    |                                                                                                                                                                                                                                                                                                                                                                   |                                                                                                                                                                                                                          |                                                                                                                                                                                                                                                                                                                                                                                                    |    |
|----------------------------------------------------------------------------------------------------------------------------------------------------------------------------------------------------------------------------------------------------------------------------------------------------------------------------------------------------------------------------------------------------------------------------------------------------------------------------------------------------------------------------------------------------------------------------------------------------------------------------------------------------------------------------------------------------------------------------------------------------------------------------------------------------------------------------------------------------------------------------------|------------------|---------------------------------------------------------|----------------------------------------------|----|-------------------------------------------------------------------------------------------------------------------------------------------------------------------------------------------------------------------------------------------------------------------------------------------------------------------------------------------------------------------|--------------------------------------------------------------------------------------------------------------------------------------------------------------------------------------------------------------------------|----------------------------------------------------------------------------------------------------------------------------------------------------------------------------------------------------------------------------------------------------------------------------------------------------------------------------------------------------------------------------------------------------|----|
| Pomykala <sup>38</sup><br>2012<br>USA                                                                                                                                                                                                                                                                                                                                                                                                                                                                                                                                                                                                                                                                                                                                                                                                                                            | RCT              | Dementia patients attending geri-psych / memory clinic. | Primary family caregiver, seeing pt >3x/week | 10 | 8 wks (12min/day) with baseline session with instruction then using CD<br><br><u>Content:</u><br>Chanting meditation (Kundalini yoga) with initial. All participants received info on caregiver health, dementia course and prognosis (meditation and relaxation groups).                                                                                         | Relaxation group: 8 wks (12min/day)<br><br><u>Content:</u><br>relax in quiet place w/eyes closed while listening to provided instrumental music CD.                                                                      | <u>Instruments</u><br>• SF 36 Health Survey<br>▪ Mental Component Score (MCS)<br>▪ Physical Component Score (PCS)<br>• Hamilton Rating Score for Depression (HAM-D)<br>• Caregiver Burden<br>• Mini-Mental Status Exam (MMSE)<br><br>PET scan to measure resting metabolism/3D CT Head for reconstruction and attenuation correction<br><br><u>Measurement timing:</u><br>baseline and at 8 weeks. | 13 |
| <p><b>Results</b><br/>9 caregivers completed intervention and were analyzed.<br/>SF36: PCS 36 declines in intervention and control groups; MCS 36 increased in intervention group greater than control group<br/>HAM-D decline in intervention and control groups<br/>Caregiver Burden declines in intervention and control group<br/>PET: Meditation grp: decreased metabolism over time in R inferior frontal cortex t=4.438 p=.021 Relaxation: increased metabolism over time t=2.88,p=0.046, sig diff btw grps: t= 4.74 p=0.001. R post cingulate cortex had 2nd biggest sig diff btw grps t=3.98, p=0.002, decreased metabolism in meditators. L associative visual cortex decreased metabolism in meditators t=4.15, p= 0.002 though analysis not a priori. Increasing metabolism in meditators &amp; stat sig diff btw grps for L sup frontal cortex t= 5.37, p=0.001</p> |                  |                                                         |                                              |    |                                                                                                                                                                                                                                                                                                                                                                   |                                                                                                                                                                                                                          |                                                                                                                                                                                                                                                                                                                                                                                                    |    |
| van Puymbroeck <sup>23</sup><br>2010<br>USA                                                                                                                                                                                                                                                                                                                                                                                                                                                                                                                                                                                                                                                                                                                                                                                                                                      | controlled trial | Adult patient                                           | Informal caregivers to an adult patient.     | 18 | 8 wks (2hr session/wk with 4 hr retreat at wk 6). Practice at home 30min, 3x/wk with CD/audiotape.<br><br><u>Content:</u><br>Quiet meditation, weekly discussion topic (communication styles, assertiveness skills) and technique: sitting meditation, stretching, deep breathing, body scan, practicing being present, then guided imagery or silent meditation. | Mall Walking: 8 wks, 1 session/wk ( 20min sessions increasing to 60 min sessions).<br><br><u>Content</u><br>Weekly educational article re: exercise, discussed next session. Recorded home practice-15min to 45 min /day | <u>Instruments</u><br>• Center of Epidemiological Studies Depression Scale (CES-D)<br>• State Trait Anxiety Inventory (STAI)<br>• Sense of Competence Questionnaire (SCQ)<br>• Caregiver Burden<br>• Satisfaction with Life Scale (SWLS)<br>• Sense of Coherence<br><br><u>Measurement timing:</u><br>Baseline and at 8 weeks:                                                                     | 15 |
| <p><b>Results</b><br/>12 of the 18 participants completed wk 8 survey - only their data included in results. Caregivers who completed study were sig older t=-2.188 p&lt;0.05 and gave more hrs/day of care than those who dropped out t=-3.146 p&lt;0.05<br/>CES-D: less depressive symptoms at T2 for MBSR vs MW t=-2.508 p&lt;0.05<br/>STAI Mean score higher in control grp at T1 t=3.827,p&lt;0.05. control grp state anxiety increased over 8 wks t=-2.94 p&lt;0.05. Attrition grp had sig higher state anxiety than those who completed study M=45.5 vs M=28.63 t=-3.618 p&lt;0.05. No sig diffs from T1 to T2 in MBSR group but differed from MW grp at T2: less</p>                                                                                                                                                                                                     |                  |                                                         |                                              |    |                                                                                                                                                                                                                                                                                                                                                                   |                                                                                                                                                                                                                          |                                                                                                                                                                                                                                                                                                                                                                                                    |    |



|                                                                                                                                                                                                                                                                                                                                                                                                                                                                                                                                                                                                                                                                                                                                                                            |                                                                                                                                                                                                                                                                                                                                    |                                             |                                                                                             |    |                                                                                                                                                                                                                                      |                                                                                                                                                                                                                                          |                                                                                                                                                                                                                                                                                                                                                                                                                                                                           |    |
|----------------------------------------------------------------------------------------------------------------------------------------------------------------------------------------------------------------------------------------------------------------------------------------------------------------------------------------------------------------------------------------------------------------------------------------------------------------------------------------------------------------------------------------------------------------------------------------------------------------------------------------------------------------------------------------------------------------------------------------------------------------------------|------------------------------------------------------------------------------------------------------------------------------------------------------------------------------------------------------------------------------------------------------------------------------------------------------------------------------------|---------------------------------------------|---------------------------------------------------------------------------------------------|----|--------------------------------------------------------------------------------------------------------------------------------------------------------------------------------------------------------------------------------------|------------------------------------------------------------------------------------------------------------------------------------------------------------------------------------------------------------------------------------------|---------------------------------------------------------------------------------------------------------------------------------------------------------------------------------------------------------------------------------------------------------------------------------------------------------------------------------------------------------------------------------------------------------------------------------------------------------------------------|----|
|                                                                                                                                                                                                                                                                                                                                                                                                                                                                                                                                                                                                                                                                                                                                                                            | state anxiety $t=-2.52$ $p<0.05$ at 8 wks<br>SCQ Caregiver Burden: declined in intervention group, increased in control group<br>SOC self-efficacy: At T2 MBSR scores higher $t=-3.83$ $p<0.05$ .<br>SWLS: MBSR grp: increased from average to high, MW: decreased to slightly below average, though neither change was stat sig). |                                             |                                                                                             |    |                                                                                                                                                                                                                                      |                                                                                                                                                                                                                                          |                                                                                                                                                                                                                                                                                                                                                                                                                                                                           |    |
| Waelde <sup>34</sup><br>2004<br>USA                                                                                                                                                                                                                                                                                                                                                                                                                                                                                                                                                                                                                                                                                                                                        | pre-post                                                                                                                                                                                                                                                                                                                           | Community-based dementia patients (MMSE<23) | Female Caucasian or Latina family caregivers, providing >4hr/day for dementia pt w/dementia | 14 | 6 sessions (5 sessionsx90 min & 1 session x3hrs). Practice 30min/day, 6 days/wk with cassettes, home manual.<br><br>Content: meditation, hatha yoga, guided imagery. Discussion of applying techniques to stressful care situations. | N/A                                                                                                                                                                                                                                      | <u>Instruments</u> <ul style="list-style-type: none"> <li>Centre for Epidemiologic Studies Depression Scale (CES-D)</li> <li>Revised Scale for Caregiver Self-Efficacy</li> <li>State Trait Anxiety Inventory (STAI)</li> <li>Revised Memory &amp; Behavior Problem Checklist <ul style="list-style-type: none"> <li>Caregiver Burden</li> <li>Caregiver Self-Efficacy</li> </ul> </li> </ul><br><u>Measurement timing:</u><br>1 wk pre-intervention and 1 month post     | 8  |
| <b>Results</b><br>Large tx effect size(>0.8) for depression, medium(>0.5) for anxiety, self-efficacy.<br>CES-D: 23.5(17.78) to 18.50(17.05) ( $p<0.01$ )<br>STAI 24.75(7.16) to 21.08(7.39) ( $p<0.05$ ) RSCSE: 61.38 (22.35) to 74.29(10.68) ( $p<0.05$ )<br>RMBPC Caregiver Burden: decreased after meditation intervention<br>RMBPC Caregiver Self-Efficacy: decreased after meditation intervention<br>F/U Questionnaire: 70% felt better at 1month<br>Extended baseline assessments-data available for 8 pts from 2 years pre-intervention showed stat sig increase in # of caregiving problems before tx (5(1.41) to 13.88(7.79) $p<0.01$ .Tx adherence assoc w/change in depression score $p<0.02$ , session attendance correlates w/weekly practice time $p=0.009$ |                                                                                                                                                                                                                                                                                                                                    |                                             |                                                                                             |    |                                                                                                                                                                                                                                      |                                                                                                                                                                                                                                          |                                                                                                                                                                                                                                                                                                                                                                                                                                                                           |    |
| Whitebird <sup>25</sup><br>2012<br>USA                                                                                                                                                                                                                                                                                                                                                                                                                                                                                                                                                                                                                                                                                                                                     | RCT                                                                                                                                                                                                                                                                                                                                | Community-dwelling dementia pt              | Primary family caregiver to dementia pt, score>5/10 on perceived stress scale               | 78 | 8 wks (2.5 hr wkly sessions, 1 wellness retreat x 5 hrs).<br><br>Content: Sitting, walking meditation, body scan, Hatha yoga and stretching exercises. Given CDs for home and written material.                                      | 8 wks (2.5 hr wkly sessions, 1 wellness retreat x 5 hrs).<br><br>Content: Community Caregiver Education and Social Support (CCES): info on self care, grief, loss, dementia, legal/financial issues, communication, community resources. | <u>Instruments</u> <ul style="list-style-type: none"> <li>Perceived Stress Scale (PSS)</li> <li>Centre for Epidemiologic Studies Depression Scale (CESD)</li> <li>State Trait Anxiety Inventory (STAI)</li> <li>Short Form-12 Health Survey (MCS-12)</li> <li>Caregiver Burden: Montgomery Borgatta Caregiver Burden Scale, Study Social Support Survey</li> </ul><br><u>Measurement timing:</u> Surveys at orientation, post-intervention (2 months) and 6 months later. | 17 |
| <b>Results</b><br>MCS: at 2 months: MBS had stat sig better mental health scores and maintained the improvement: 36.6 baseline to 47.4 @ 2months to 49.7 at 6 months,                                                                                                                                                                                                                                                                                                                                                                                                                                                                                                                                                                                                      |                                                                                                                                                                                                                                                                                                                                    |                                             |                                                                                             |    |                                                                                                                                                                                                                                      |                                                                                                                                                                                                                                          |                                                                                                                                                                                                                                                                                                                                                                                                                                                                           |    |

p=0.007. CCES scores: 40.04 baseline, 40.8 at 2 months and 44.6 at 6 month. Sig diff btw the grps at 6 months p=0.04.  
PSS: At 2 months MBSR had lower stress scores vs CCES (15.2 vs 19.3 CCES) p=0.007  
CEES-D: MBSR at 2months: 10.6 vs 17.1 for CEES p=0.005. At 6 months the grps were not stat sig diff from each other.  
For all other outcomes, no sig diffs btw grps at 2 months or 6 months.

**eTable 2. Main Results Table, Health Professionals**

| Reference                                                                                                                                                                                                                                                                                                                                                                                                                                                                                                                                                                                                                                                                                                                                                                                                                                                                                                              | Study Design     | Caregiver's service population   | Caregiver population    | # Enrolled | Intervention                                                                                                                                                                                                                                                        | Control Group | Outcomes (including measurement instruments and timing)                                                                                                                                                                                                                                                                                                                                                                           | Study Quality Score (Downs and Black Criteria <sup>13</sup> ) |
|------------------------------------------------------------------------------------------------------------------------------------------------------------------------------------------------------------------------------------------------------------------------------------------------------------------------------------------------------------------------------------------------------------------------------------------------------------------------------------------------------------------------------------------------------------------------------------------------------------------------------------------------------------------------------------------------------------------------------------------------------------------------------------------------------------------------------------------------------------------------------------------------------------------------|------------------|----------------------------------|-------------------------|------------|---------------------------------------------------------------------------------------------------------------------------------------------------------------------------------------------------------------------------------------------------------------------|---------------|-----------------------------------------------------------------------------------------------------------------------------------------------------------------------------------------------------------------------------------------------------------------------------------------------------------------------------------------------------------------------------------------------------------------------------------|---------------------------------------------------------------|
| Brady <sup>18</sup><br>2011<br>USA                                                                                                                                                                                                                                                                                                                                                                                                                                                                                                                                                                                                                                                                                                                                                                                                                                                                                     | Pre-post         | Inpatient behavioral health unit | Behavioral health staff | 23         | 4 wk mindfulness program (1 hour/week class x 4weeks, plus 30 minutes/day at home practice with CD.)<br><br><u>Content:</u> Sitting, walking and lying meditation instruction; attention to breath; mindful eating; total body relaxation; incorporation into work. | N/A           | <u>Instruments</u><br><ul style="list-style-type: none"> <li>• Mental Health Professionals Stress Scale (MHPSS)</li> <li>• Toronto Mindfulness Scale (TMS)</li> <li>• Sense of Self Scale (SOSS)</li> <li>• Maslach Burnout Inventory for Human Services (MBI)</li> <li>• Patient Satisfaction Survey (PSS)</li> </ul> Patient safety events<br><br><u>Measurement timing:</u><br>3 months before and 3 months after intervention | 10                                                            |
| <p><b>Results</b><br/>           MHPSS: decreased after class (M 53.63,SD 18.27) and post-intervention (M39.56, SD 20.63) t(15) 3.89,p&lt;0.01.<br/>           MBI: no sig diff for depersonalization, emotional exhaustion or personal accomplishment<br/>           TMS: mindfulness score stat sig increase M 25.50, SD 10.75 vs M 32.75, SD 11.19, t(15) 3.14, p&lt;0.01 post-tx.<br/>           SOSS: Stat sig increases on self acceptance, sense of what is possible, responsibility to care for own health, and total SOSS score (189.63, SD 31.09 to 206.44, SD 29.91 p&lt;0.02).<br/>           PSS: Pt satisfaction w/RNs increased 4.62% 3 months post MBSR. Satisfaction w/psychiatrists decreased (1/6 participated), other staff increased 6% - largest quarterly increase of the year<br/>           Thematic analysis: value of class: connecting to self, awareness of need to improve self-care</p> |                  |                                  |                         |            |                                                                                                                                                                                                                                                                     |               |                                                                                                                                                                                                                                                                                                                                                                                                                                   |                                                               |
| Cohen-Katz <sup>19</sup><br>2005<br>USA                                                                                                                                                                                                                                                                                                                                                                                                                                                                                                                                                                                                                                                                                                                                                                                                                                                                                | Controlled Trial | Community hospital               | Nurses                  | 27         | 8 week MBSR program (2.5 hrs/wk with one 6 hour retreat and daily practice homework with audiotape).<br><br><u>Content:</u> communication skills, stress-reactivity, self-compassion and experiential exercises.                                                    | Waitlist      | <u>Instruments</u><br><ul style="list-style-type: none"> <li>• Maslach Burnout Inventory (MBI)</li> <li>• Brief Symptom Inventory (BSI)</li> <li>• Mindfulness Attention and Awareness Scale (MAAS)</li> </ul> <u>Measurement timing:</u><br>Before intervention, post-intervention & 3 months post-intervention.                                                                                                                 | 9                                                             |
| <p><b>Results</b><br/>           MBI: <i>emotional exhaustion</i>: stat sig greater reduction for tx group p=0.05; <i>personal accomplishment</i>: stat sig greater increase for tx group p=0.014<br/>           MBSR within grp analysis: stat sig decrease in emotional exhaustion btw T1 and T2, p=0.001 and T3 p=0.01. <u>BSI</u>: # of pts w/elevated distress decreased in MBSR and control group.<br/>           MAAS: stat sig diff btw grp means post-tx: p=0.001. Stat sig change btw pre and post-tx for MBSR group p=0.004, and btw pre and 3 months post-tx p=0.002</p>                                                                                                                                                                                                                                                                                                                                   |                  |                                  |                         |            |                                                                                                                                                                                                                                                                     |               |                                                                                                                                                                                                                                                                                                                                                                                                                                   |                                                               |

|                                       |                                                                                                                                                                                                                                                                                                                                                                                                                                                                                                                                                                                                                                                                                                                                                                                                                                      |                                      |                                                   |    |                                                                                                                                                                                                                                                                                                                    |     |                                                                                                                                                                                                                  |    |
|---------------------------------------|--------------------------------------------------------------------------------------------------------------------------------------------------------------------------------------------------------------------------------------------------------------------------------------------------------------------------------------------------------------------------------------------------------------------------------------------------------------------------------------------------------------------------------------------------------------------------------------------------------------------------------------------------------------------------------------------------------------------------------------------------------------------------------------------------------------------------------------|--------------------------------------|---------------------------------------------------|----|--------------------------------------------------------------------------------------------------------------------------------------------------------------------------------------------------------------------------------------------------------------------------------------------------------------------|-----|------------------------------------------------------------------------------------------------------------------------------------------------------------------------------------------------------------------|----|
| Cutshall <sup>44</sup><br>2011<br>USA | Pre-post                                                                                                                                                                                                                                                                                                                                                                                                                                                                                                                                                                                                                                                                                                                                                                                                                             | Critically ill hospitalized patients | Registered Nurses                                 | 11 | 4 wks (30 min session, 4x/wk)<br><br><u>Content:</u> Healing Rhythms Meditation Program for computer use: 15 steps – quiet the mind, observe thoughts, open yourself to others, etc, with each step taking 20min to learn.                                                                                         | N/A | <u>Instruments</u><br>• Short Form 36 (SF 36) Vitality Subscale<br>• State Trait Anxiety Inventory (STAI)<br>• Linear Analogue Self Assessment (LASA)<br><br><u>Measurement timing:</u> baseline and 4 weeks     | 11 |
|                                       | <u>Results</u><br>All 4 scales showed stat sig improvement<br>SF 36 vitality subscale diff in mean 0.65 SD 0.87 p=0.04<br>STAI -0.41 SD 0.52 p=0.03<br>LASA anxiety diff in mean 2.27 SD 2.49 p=-0.01; LASA stress diff in mean -2.09 SD 2.39 p=0.01                                                                                                                                                                                                                                                                                                                                                                                                                                                                                                                                                                                 |                                      |                                                   |    |                                                                                                                                                                                                                                                                                                                    |     |                                                                                                                                                                                                                  |    |
| Goodman <sup>21</sup><br>2012<br>USA  | Pre-post                                                                                                                                                                                                                                                                                                                                                                                                                                                                                                                                                                                                                                                                                                                                                                                                                             | University medical centre            | physicians, nurses, psychologists, social workers | 93 | 8 wk MBSR (2.5 hrs/wk and 7 hr silent retreat). Homework: practice 45min/day, 6 days/wk )<br><br><u>Content:</u> Body scan, mindful movement, sitting/walking meditation. Mindfulness overview, application to life/challenging situations, mindful communication, compassion meditation, practicing appreciation. | N/A | <u>Instruments</u><br>• Maslach Burnout Inventory (MBI)<br>• Short Form 12 (SF 12)<br>○ Mental Component Score<br>○ Physical Component Score<br><br><u>Measurement timing:</u> Completed at first and last class | 8  |
|                                       | <u>Results</u><br><u>MBI:</u> Stat sig improvement for all HCPs on all subscales. Stat sig diff btw MD improvement (6.9) vs other HCPs (2.9) on emotional exhaustion score, p=0.016. Emotional exhaustion subscale: for MDs: pre 28.1 SD 9.8, post 21.3 SD 8.8, p <0.001, other HCPs: 21.7 SD 10.2 pre, post 18.8 SD 9.4, p=0.028, depersonalization: for MDs: pre: 9.2 SD 6.0, post 6.7 SD 5.3 p=0.001, other HCP: pre 5.0 SD 3.8, post 4.0 SD 3.6 p=0.039, Personal accomplishment for MDs: pre: 37.7 SD 5.8, post 41.0 SD 5.1 p<0.001, other HCPs: 38.4 SD 6.1, post 41.0 SD 5.7 p<0.001<br>SF12 (MCS) physicians: pre 40.9 SD 8,8 post 48.5 SD 6.1 p<0.001; Others: pre 43.8 SD 9.3, post 50.0 SD 6.1 p<0.001<br>SF12 (PCS) physicians: pre 58.5 SD 6.8 pst 57.6 SD 4.2, p .28; Others: pre 26.0 SD 5.5 post 55.9 SD 3.9, p=0.88 |                                      |                                                   |    |                                                                                                                                                                                                                                                                                                                    |     |                                                                                                                                                                                                                  |    |

|                                                                                                                                                                                                                                                                                                                                                                                                                                                                                                                                                                                                                                                                                                                                                                                                                                                                                                                                              |                  |                                                                    |                       |    |                                                                                                                                                                                                                                                                                                                                                                                                                    |          |                                                                                                                                                                                                                                                                                                                                                                                                  |    |
|----------------------------------------------------------------------------------------------------------------------------------------------------------------------------------------------------------------------------------------------------------------------------------------------------------------------------------------------------------------------------------------------------------------------------------------------------------------------------------------------------------------------------------------------------------------------------------------------------------------------------------------------------------------------------------------------------------------------------------------------------------------------------------------------------------------------------------------------------------------------------------------------------------------------------------------------|------------------|--------------------------------------------------------------------|-----------------------|----|--------------------------------------------------------------------------------------------------------------------------------------------------------------------------------------------------------------------------------------------------------------------------------------------------------------------------------------------------------------------------------------------------------------------|----------|--------------------------------------------------------------------------------------------------------------------------------------------------------------------------------------------------------------------------------------------------------------------------------------------------------------------------------------------------------------------------------------------------|----|
| Krasner <sup>31</sup><br>2009<br>USA                                                                                                                                                                                                                                                                                                                                                                                                                                                                                                                                                                                                                                                                                                                                                                                                                                                                                                         | pre-post         | Primary care                                                       | Physicians            | 70 | 8 wk MBSR (2.5 hrs/wk and 7 hr session btw 6th and 7 <sup>th</sup> wk)<br>Maintenance phase: 2.5 hr session each month x 10 months after the 8th session.<br><br><u>Content:</u> preventing burnout, awareness of thoughts, reflecting on practice experiences.<br>The 7 hr session: guided silent meditation.<br>Other techniques: body scan, sitting/walking meditation, mindful movement (yoga type exercises). | N/A      | <u>Instruments</u><br>• 2 Factor Mindfulness Scale<br>• Maslach Burnout Inventory (MBI)<br>• Jefferson Scale of Physician Empathy<br>• Physician Belief Scale (PBS)<br>• Mini-markers of Big Five Factor Structure Personality Scale<br>• Profile of Moods States (PoMS)<br>o Depression subscale<br><br><u>Measurement timing:</u><br>Baseline, pre-intervention, 8 weeks, 12 months, 15 months | 16 |
| <p><b>Results</b><br/> <u>MBI:</u> all subscales-moderate improvements effect sizes at 8 weeks, 12 months, and 15 months (all p&lt;.05), except depersonalization NS at 8 weeks<br/> <u>Empathy:</u> increased at 8 weeks, 12 months, and 15 months (all p &lt; .001)<br/> <u>PBS:</u> increased at 8 weeks, 12 months, and 15 months (all p &lt; .001)<br/> <u>PoMS:</u> depression improved at 8 weeks, 12 months, and 15 months (p=.06 at 8 weeks, others p &lt; .001)<br/> Overall mood disturbance improved at 8 weeks, 12 months, and 15 months (all p&lt;0.001)<br/> <u>Mindfulness:</u> largest effect sizes at 15 months for: total score, observe and nonreact: p&lt;0.001. Correlate w/decrease in total mood disturbance p&lt;0.001: decreased tension, depression, fatigue subscales. Moderate correlate w/decrease in emotional exhaustion p&lt;0.001. Emotional stability, accomplishment, conscientiousness: p&lt;0.001.</p> |                  |                                                                    |                       |    |                                                                                                                                                                                                                                                                                                                                                                                                                    |          |                                                                                                                                                                                                                                                                                                                                                                                                  |    |
| Mackenzie <sup>26</sup><br>2006<br>USA                                                                                                                                                                                                                                                                                                                                                                                                                                                                                                                                                                                                                                                                                                                                                                                                                                                                                                       | Controlled Trial | Geriatric teaching hospital: LTC and complex continuing care units | Nurses & nurses aides | 30 | 4 wks (30 min/wk) didactic and experiential exercises.<br><br><u>Content:</u> mindful eating, stretch, sitting with awareness of thoughts, body scan. Homework: CD to practice 10min/day, 5 days/wk, a manual summarizing key points and assignments.                                                                                                                                                              | waitlist | <u>Instruments</u><br>• Maslach Burnout Inventory (MBI)<br>• Smith Relaxation Dispositions Inventory<br>• Job Satisfaction Scale (JSS)<br>• Satisfaction with Life Scale (SwLS)<br>• Antonovsky's Orientation to Life Questionnaire<br><br><u>Measurement timing:</u><br>Before and after 4 week intervention.                                                                                   | 14 |
| <p><b>Results</b><br/> <u>MBI:</u> MBSR exhaustion decreased, control increased: stat sig grp x time intervention 4.96 p&lt;0.05. Depersonalization: stable for MBSR, stat sig increase for control: grp x time interaction 4.88 p&lt;0.05.<br/> <u>JSS:</u> MBSR stat sig &amp; higher vs control pre and post: 10.10 p=0.004. Coherence: sig effect of time for both grps p-0.004<br/> <u>SwLS:</u> sig MBSR increase, F=7.07, p&lt;0.01</p>                                                                                                                                                                                                                                                                                                                                                                                                                                                                                               |                  |                                                                    |                       |    |                                                                                                                                                                                                                                                                                                                                                                                                                    |          |                                                                                                                                                                                                                                                                                                                                                                                                  |    |

|                                                                                                                                                                                                                                                                                                                                                                                                                                                                                                                                                                                                                                                                                                                                                                                                                                                                                    |                     |                             |                                                                |    |                                                                                                                                                                                                                                                                                                                                                |                                                                                                                                         |                                                                                                                                                                                                                                                                                                                                                                                                                                                                                                                                                                                                                                                                                                        |    |
|------------------------------------------------------------------------------------------------------------------------------------------------------------------------------------------------------------------------------------------------------------------------------------------------------------------------------------------------------------------------------------------------------------------------------------------------------------------------------------------------------------------------------------------------------------------------------------------------------------------------------------------------------------------------------------------------------------------------------------------------------------------------------------------------------------------------------------------------------------------------------------|---------------------|-----------------------------|----------------------------------------------------------------|----|------------------------------------------------------------------------------------------------------------------------------------------------------------------------------------------------------------------------------------------------------------------------------------------------------------------------------------------------|-----------------------------------------------------------------------------------------------------------------------------------------|--------------------------------------------------------------------------------------------------------------------------------------------------------------------------------------------------------------------------------------------------------------------------------------------------------------------------------------------------------------------------------------------------------------------------------------------------------------------------------------------------------------------------------------------------------------------------------------------------------------------------------------------------------------------------------------------------------|----|
| Oman<br>2006 <sup>41</sup><br>2008 <sup>42</sup><br>2010 <sup>43</sup><br>USA                                                                                                                                                                                                                                                                                                                                                                                                                                                                                                                                                                                                                                                                                                                                                                                                      | Controlled<br>Trial | 2<br>Colorado<br>hospitals  | Nurses, MDs,<br>PTs, OTs,<br>chaplains,<br>psych<br>counselors | 61 | 8 wks (2hrs/wk) Eight<br>Point Program<br>adaptation.<br><br><u>Content:</u> Passage<br>meditation, mantra<br>repetition, focused<br>attention, training the<br>senses, putting others<br>first, inspirational<br>reading. Non-sectarian,<br>spiritually focused.<br>2 Esawaran texts for<br>recommended reading<br>and meditation<br>passages | waitlist                                                                                                                                | <u>Instruments:</u> <ul style="list-style-type: none"> <li>• Relational Caregiving Self-Efficacy Scale (RCSES)</li> <li>• Maslach Burnout Inventory (MBI)</li> <li>• Global Measure of Perceived Empathy</li> <li>• Multidimensional Measurement of Religiousness &amp; Spirituality</li> <li>• Assessment of Altruism and Correlate</li> <li>• Given Love Scale</li> <li>• Marlowe-Crown Scale</li> <li>• Perceived Stress Scale (PSS)</li> <li>• Daily Spiritual Experience Scale</li> </ul> <p>Qualitative semi-structured interviews w/13 tx pts, 11 controls</p> <p><u>Measurement timing:</u><br/>Registration Exam 1, 8 wks (last session): Exam 2 8 wks later: Exam 3 19 wks later: Exam 4</p> | 16 |
| <p><b>Results</b><br/> RCSES: Mean self-efficacy gain in tx grp 0.84, control grp 0.45: 50% of tx grp<br/> PSS: decreased after intervention, p&lt;.01<br/> MBI: all subscales no statistically significant change<br/> Given Love and sense of compassion correlate w/self-efficacy p&lt;0.05. Stat sig tx effects p&lt;0.50 at all post-tx assessments. Tx effect at Exam 2: 0.38 larger vs control, 0.47 at 8 wk f/u, 0.37 at 19 wk f/u - medium-size effects.<br/> Altruistic actions/empathy tx effects not constant over time p&lt;0.05. Altruism: no sig diff from exam 2 to 3 but dropped from exam 3 to 4 p=0.001.<br/> Empathy increased sig from 2 to 3 p=0.03 but not from 3 to 4.<br/> Qualitative: Caregiver disposition -increased understanding, ability to be respectful w/patients. Expanded self-efficacy across all areas of life, more productive at work</p> |                     |                             |                                                                |    |                                                                                                                                                                                                                                                                                                                                                |                                                                                                                                         |                                                                                                                                                                                                                                                                                                                                                                                                                                                                                                                                                                                                                                                                                                        |    |
| Pipe <sup>27</sup><br>2009<br>USA                                                                                                                                                                                                                                                                                                                                                                                                                                                                                                                                                                                                                                                                                                                                                                                                                                                  | Controlled<br>Trial | US health<br>care<br>system | Nurses                                                         | 33 | 5 sessions x2 hrs ea.<br><u>Content:</u> didactic and<br>experiential, nursing-<br>specific examples.<br>Homework: 30 min/day<br>of practice                                                                                                                                                                                                   | 5 sessions<br>x 2 hrs,<br>facilitated<br>'attention-<br>control'<br>(Advanced<br>principles<br>of stress &<br>leadership<br>strategies) | <u>Instruments:</u> <ul style="list-style-type: none"> <li>• Symptom Checklist 90-Revised <ul style="list-style-type: none"> <li>▪ Depression subscale</li> <li>▪ Anxiety subscale</li> </ul> </li> <li>• Global Severity Index (GSI)</li> <li>• Positive Symptom Distress Index (PSDI)</li> <li>• Caring Efficacy Scale (CES)</li> </ul> <p><u>Measurement timing:</u> baseline and 4 weeks</p>                                                                                                                                                                                                                                                                                                       | 18 |
| <p><b>Results</b><br/> Symptom Checklist: Depression and anxiety stat sig improvement in intervention group, p&lt;0.05<br/> PSDI: sd p&lt;0.05 for tx grp. Control grp: stat sig improvement for CES but less than tx grp.<br/> Caregiver Efficacy Scale: p&lt;0.05 for tx grp. Control grp: stat sig improvement for CES but less than tx grp.</p>                                                                                                                                                                                                                                                                                                                                                                                                                                                                                                                                |                     |                             |                                                                |    |                                                                                                                                                                                                                                                                                                                                                |                                                                                                                                         |                                                                                                                                                                                                                                                                                                                                                                                                                                                                                                                                                                                                                                                                                                        |    |

| <u>GSI:</u> Change from baseline btw groups: tx grp stat sig greater improvement vs control                                                                                                                                                                                                                                                                                                                                                                                                                                                                                                                                                                                                         |                     |                       |                              |    |                                                                                                                                                                                                                                                                                                                                 |                                                                                                                                                                                                                                                                                                           |                                                                                                                                                                                                                                                                                                                                       |    |
|-----------------------------------------------------------------------------------------------------------------------------------------------------------------------------------------------------------------------------------------------------------------------------------------------------------------------------------------------------------------------------------------------------------------------------------------------------------------------------------------------------------------------------------------------------------------------------------------------------------------------------------------------------------------------------------------------------|---------------------|-----------------------|------------------------------|----|---------------------------------------------------------------------------------------------------------------------------------------------------------------------------------------------------------------------------------------------------------------------------------------------------------------------------------|-----------------------------------------------------------------------------------------------------------------------------------------------------------------------------------------------------------------------------------------------------------------------------------------------------------|---------------------------------------------------------------------------------------------------------------------------------------------------------------------------------------------------------------------------------------------------------------------------------------------------------------------------------------|----|
| Poulin <sup>28</sup><br>2008<br>USA                                                                                                                                                                                                                                                                                                                                                                                                                                                                                                                                                                                                                                                                 | Controlled<br>Trial | Geriatric<br>hospital | Nurses,<br>nurses aides      | 40 | 4 sessions x 30min ea<br><u>Content:</u> brief MBSR:<br>obstacles to practice,<br>incorporation into daily<br>life, mindfulness.<br>Bodyscan, sitting<br>meditation, 3 min<br>breathing for acute<br>stress. Homework: CD<br>and handouts, practice<br>15-20min/day                                                             | 4 sessions x<br>30min ea.<br><u>Content:</u><br>Brief Image<br>and<br>Progressive<br>Muscle<br>Relaxation:<br>impact of<br>stress,<br>imagery,<br>abdominal<br>breathing,<br>progressive<br>muscle<br>relaxation<br>3 min<br>breathing<br>for calming.<br><br>3 <sup>rd</sup> grp:<br>waitlist<br>control | <u>Instruments:</u><br><ul style="list-style-type: none"> <li>• Maslach Burnout Inventory (MBI)</li> <li>• Satisfaction with Life Scale (SwLS)</li> <li>• Smith Disposition Inventory (SDI)</li> </ul> <u>Measurement timing:</u><br>Baseline and after 4 <sup>th</sup> session                                                       | 12 |
| <p><b>Results</b><br/> <u>MBI:</u> No sig grp by time interactions on any subscales, but moderate effect size for bMBSR grp on EE subscale: sig higher EE vs other grps pre-intervention but improved to level of other grps post-test F=2.17, np<sup>2</sup>=0.1.<br/> <u>SDI:</u> Stat sig grp by time, large effect size for bMBSR pre: 35.3(8.9), post: 43.6(9.3) and bIPMR pre: 38.1(7.0) post: 50.3(11.8) vs control pre: 42.9(10), post: 41(11.4) F=4.12, np<sup>2</sup>=0.2.<br/> <u>SWLS:</u> stat sig grp by time, large effect size for bMBSR pre: 22.8(6.6) post: 26(5) and bIPMR pre: 21.1(6.5) post: 25.1(7.2) vs control pre:26.9(6.1) post:26.4(6.2) F=3.96 np<sup>2</sup>=0.18</p> |                     |                       |                              |    |                                                                                                                                                                                                                                                                                                                                 |                                                                                                                                                                                                                                                                                                           |                                                                                                                                                                                                                                                                                                                                       |    |
| Schenstrom <sup>35</sup><br>2006<br>Sweden                                                                                                                                                                                                                                                                                                                                                                                                                                                                                                                                                                                                                                                          | pre-post            | Primary<br>Care staff | MDs, RNs,<br>PTs, OTs,<br>SW | 52 | 7 days of teaching, 2-4<br>wk interval btw<br>sessions. Total of 50<br>hours of teaching.<br><u>Content:</u> Mindfulness<br>training w/lectures and<br>cognitive attitude<br>exercises. Homework:<br>booklet w/exercises for<br>weekly practice, CD of<br>guided formal<br>meditation - body scan,<br>sitting meditation, yoga. | N/A                                                                                                                                                                                                                                                                                                       | <u>Instruments:</u><br><ul style="list-style-type: none"> <li>• Mindfulness Attention and Awareness Scale (MAAS)</li> <li>• WHO 5 Well-Being Questionnaire Visual Analogue Scales measuring perceived stress at work/outside of work x 7 days.</li> </ul> <u>Measurement timing:</u><br>Pre and post intervention and 3 months later. | 11 |
| <p><b>Results</b><br/> <u>MAAS:</u> stat sig increase post-tx, p=0.02, persisted 3 months post-tx, p = 0.015.<br/> <u>WHO 5:</u> Stat sig increase in subjective well-being post-tx and 3 months post, both p=0.001.<br/> <u>Stress in workplace:</u> Decreased post-tx, p=0.01 and persisted 3 months later p=0.001.</p>                                                                                                                                                                                                                                                                                                                                                                           |                     |                       |                              |    |                                                                                                                                                                                                                                                                                                                                 |                                                                                                                                                                                                                                                                                                           |                                                                                                                                                                                                                                                                                                                                       |    |

|                                        |                                                                                                                                                                                                                                                                                                                                                |                            |                                      |    |                                                                                                                                                                                                                                                       |                                                                                                                                                     |                                                                                                                                                                                                                                                                                                                                       |    |
|----------------------------------------|------------------------------------------------------------------------------------------------------------------------------------------------------------------------------------------------------------------------------------------------------------------------------------------------------------------------------------------------|----------------------------|--------------------------------------|----|-------------------------------------------------------------------------------------------------------------------------------------------------------------------------------------------------------------------------------------------------------|-----------------------------------------------------------------------------------------------------------------------------------------------------|---------------------------------------------------------------------------------------------------------------------------------------------------------------------------------------------------------------------------------------------------------------------------------------------------------------------------------------|----|
| Severtsen <sup>15</sup><br>1986<br>USA | pre-post                                                                                                                                                                                                                                                                                                                                       | Collegiate nursing program | Nursing students                     | 10 | 1 session instruction, home practice x 7 wks.<br><u>Content:</u> mantra meditation practiced in session x 5 min. Discussion of common problems of new meditators. Written instructions for practice at home. Homework: practice 15-20min/day x 7 wks. | 1 session, home practice x 7 wks.<br><u>Content:</u> importance of aerobic exercise, appropriate heart rate during it. Practice 15-20min/day x7 wks | <u>Instruments:</u><br><ul style="list-style-type: none"> <li>• Holmes-Rahe Social Readjustment Rating Scale (HRSRS)</li> <li>• Stanford University Stress Level Test (SUSLT)</li> </ul> Baseline 15min EEG - First half of EEG w/eyes open, second half w/eyes closed.<br><br><u>Measurement timing:</u> Baseline and end of 7 weeks | 6  |
|                                        | <u>Results</u><br>HRSRS: all scores higher post-tx for exercise grp<br>SUSLT: no stat sig change, meditation grp had lower stress vs exercise grp pre-tx<br>EEG: No stat sig diff pre-post in either group for proportion of alpha and beta waves                                                                                              |                            |                                      |    |                                                                                                                                                                                                                                                       |                                                                                                                                                     |                                                                                                                                                                                                                                                                                                                                       |    |
| Shapiro <sup>24</sup><br>2005<br>USA   | Controlled Trial                                                                                                                                                                                                                                                                                                                               | VA Health System           | MDs, nurses, SWs, PTs, psychologists | 38 | 8 weeks (2hrs/wk).<br><u>Content:</u> Teaching around sitting meditation, body scan, hatha yoga, 3 min breathing space, loving kindness meditation.                                                                                                   | waitlist                                                                                                                                            | <u>Instruments:</u><br><ul style="list-style-type: none"> <li>• Brief Symptom Inventory for Psychological Distress (BSI)</li> <li>• Maslach Burnout Inventory (MBI)</li> <li>• Perceived Stress Scale (PSS)</li> <li>• Satisfaction with Life Scale (SwLS)</li> <li>• Self-Compassion Scale (SCS)</li> </ul>                          | 12 |
|                                        | <u>Results</u><br>Not intention to treat: 8/18 dropped out of tx grp, 2/20 left control.<br>PSS: Significant diff btw grps: p=0.04. Tx grp had sig mean decrease in perceived stress: 27% vs control 7%<br>SCS: sig diff btw grps p=0.004. Tx grp increased in self-compassion 22% vs 3% control.<br>SwLS, MBI, BSI: No stat sig diff btw grps |                            |                                      |    |                                                                                                                                                                                                                                                       |                                                                                                                                                     |                                                                                                                                                                                                                                                                                                                                       |    |
